# Supplementary material for: Apigenin-7-Glycoside Prevents LPS-Induced Acute Lung Injury via Downregulation of Oxidative Enzyme Expression and Protein Activation through Inhibition of MAPK Phosphorylation
Source: MDPI journal article supplement (doi:10.3390/ijms16011736), 2015-01-13
Supplement: s1 [file s1]

## Supplementary Information

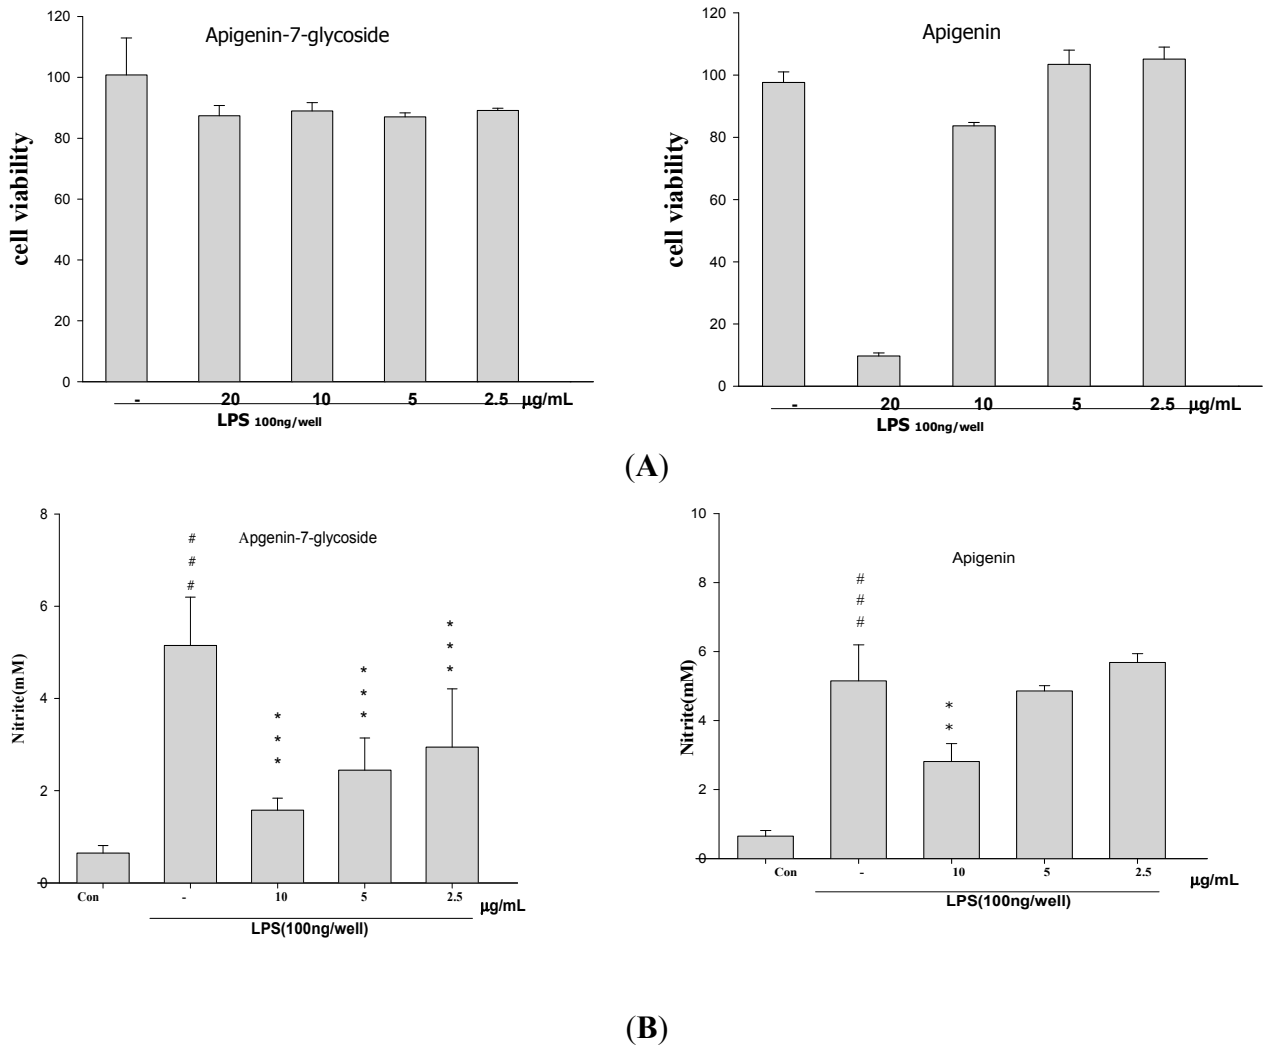

**Figure S1.** AP7Glu inhibit lipopolysaccharide (LPS) induced cell inflammation in RAW 264.7 cells. Raw cells were pre-treated with different concentrations of apigenin and AP7Glu ranging from 20, 10, 5, 2.5  $\mu$ M, or 0  $\mu$ M [referred as (-)] for 1 h prior to the addition of 100 ng/mL LPS for 24 h. **(A)** Percentage of cell viability was determined by the MTT assay; **(B)** The supernatants were harvested and quantified the NO production using by ELISA. The data were presented as mean  $\pm$  SD for the three different experiments performed in triplicate. ### compared with sample of control group (one-way ANOVA followed by Scheffe's multiple range test). \*\*  $p < 0.01$ , \*\*\*  $p < 0.001$  were compared with LPS-alone group.

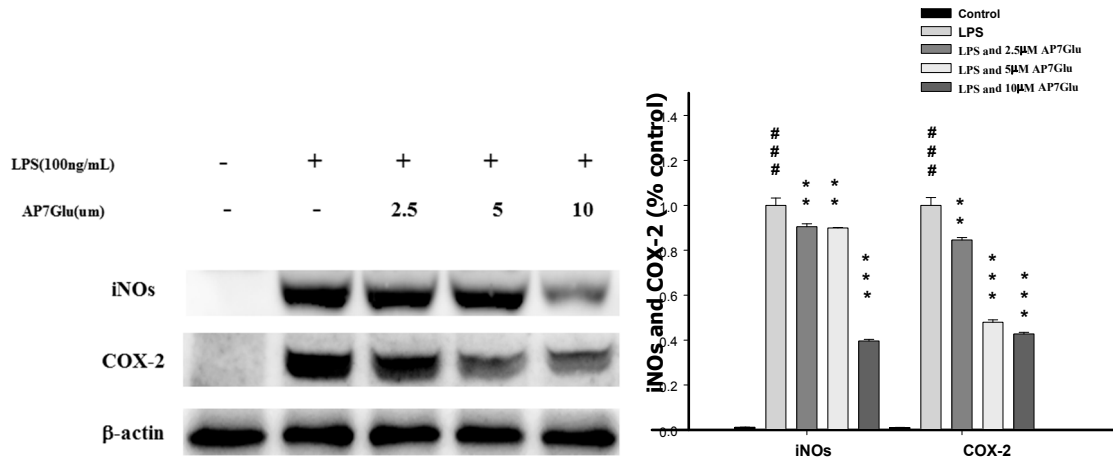

**Figure S2.** The effects of AP7Glu on lipopolysaccharide (LPS)-induced inhibition of iNOs and COX-2 protein expression is evaluated in RAW264.7 cells. Cells were incubated for 24 h with 100 ng/mL of LPS in the absence or presence of AP7Glu (0, 10, 5, 2.5 μM). AP7Glu was added 1 h before the incubation with LPS. Lysed cells were then prepared and subjected to Western blotting by using an antibody specific for iNOs, COX-2 and b-actin was used as an internal control. The data were presented as mean ± S.D for three different experiments performed in triplicate. ### compared with sample of control group, \*\*  $p < 0.01$  and \*\*\*  $p < 0.001$  were compared with LPS-alone group.
